# Supplementary material for: Development and Evaluation of Pediatric Versions of the Vanderbilt Fatigue Scale for Children With Hearing Loss
Source: PubMed Central journal article supplement — J Speech Lang Hear Res. 2022 May 27;65(6):2343–63. doi: 10.1044/2022_JSLHR-22-00051 (PMC9907440; doi:10.1044/2022_jslhr-22-00051), 2022-05-27
Supplement: JSLHR-65-2343-s001.pdf [file JSLHR-65-2343-s001.pdf]

**Supplemental Material S1.** Construct map showing domains and severity levels of listening-related fatigue in CHL. This map was used to guide development of the VFS-Peds items.

| Severity of LRF | Social-Emotional                                                                                                                                                                                                                                                                                                                                                                                           | Cognitive                                                                                                                                                                                                                                               | Physical                                                                                                                                                                                                                                                                                                                                                                                              |
|-----------------|------------------------------------------------------------------------------------------------------------------------------------------------------------------------------------------------------------------------------------------------------------------------------------------------------------------------------------------------------------------------------------------------------------|---------------------------------------------------------------------------------------------------------------------------------------------------------------------------------------------------------------------------------------------------------|-------------------------------------------------------------------------------------------------------------------------------------------------------------------------------------------------------------------------------------------------------------------------------------------------------------------------------------------------------------------------------------------------------|
| Severe          | <p><u>Feelings/Behaviors:</u> Becomes <b>extremely sad, upset, angered, stressed</b> and/or <b>emotionally exhausted</b> by listening difficulties /fatigue. May throw <b>tantrums</b> and exhibit <b>aggression</b>. Social life is <b>severely impacted</b> by listening fatigue. Exhibits <b>avoidance</b> behaviors <b>isolates</b> oneself from social gatherings to cope with listening fatigue.</p> | <p><u>Feelings/Behaviors:</u> Becomes <b>unwilling /unable to maintain effort and attention</b> when completing even routine mental activities. Becomes very unfocused and/or consciously decides to disengage (e.g., <b>shuts down, gives up</b>).</p> | <p><u>Feelings/Behaviors:</u> Feels <b>exhausted, drained and/or worn out</b> from listening. Requires <b>naps, additional sleep, and/or silent time</b> to recover from listening fatigue. Regular breaks need to be <b>scheduled into school day</b>. Reports of <b>significant sleep problems</b>. Reports <b>significant headache problems</b>. Reports need to <b>remove</b> hearing device.</p> |
|                 | <p><u>Situations:</u> Occurs across a <b>wide range</b> of easy-to-challenging listening situations</p>                                                                                                                                                                                                                                                                                                    |                                                                                                                                                                                                                                                         |                                                                                                                                                                                                                                                                                                                                                                                                       |
| Moderate        | <p><u>Feelings/Behaviors:</u> Becomes <b>stressed, sad, frustrated, upset</b> and/or <b>emotionally tired</b> by listening difficulties/fatigue. Social life is <b>moderately impacted</b> by listening fatigue. May avoid and/or withdraw from certain social gatherings.</p>                                                                                                                             | <p><u>Feelings/Behaviors:</u> Must apply substantial <b>mental effort to remain attentive</b> when listening and following conversations. May <b>tune/zone out</b>. May need <b>prompting</b>.</p>                                                      | <p><u>Feelings/Behaviors:</u> Feels <b>tired</b> after listening. May take <b>listening breaks</b> to recover. May get <b>headaches</b> from listening. May show <b>abnormal sleep habits/patterns</b>. May <b>turn down</b> hearing device.</p>                                                                                                                                                      |
|                 | <p><u>Situations:</u> Occurs in <b>moderately-challenging</b> listening situations or worse</p>                                                                                                                                                                                                                                                                                                            |                                                                                                                                                                                                                                                         |                                                                                                                                                                                                                                                                                                                                                                                                       |
| Mild            | <p><u>Feelings/Behaviors:</u> Becomes <b>irritated, embarrassed or anxious</b> from listening difficulties/fatigue. Social life is <b>mildly impacted</b> by listening fatigue. May avoid and/or withdraw from certain social gatherings.</p>                                                                                                                                                              | <p><u>Feelings/Behaviors:</u> <b>Some difficulty</b> following fast-paced conversations and remaining attentive.</p>                                                                                                                                    | <p><u>Feelings/Behaviors:</u> May exhibit mild tiredness after listening. Would enjoy a <b>short rest or a listening break</b> (not a requirement).</p>                                                                                                                                                                                                                                               |
|                 | <p><u>Situations:</u> Occurs only in <b>very challenging</b> listening situations</p>                                                                                                                                                                                                                                                                                                                      |                                                                                                                                                                                                                                                         |                                                                                                                                                                                                                                                                                                                                                                                                       |
