# Supplementary material for: Development and Evaluation of Pediatric Versions of the Vanderbilt Fatigue Scale for Children With Hearing Loss
Source: PubMed Central journal article supplement — J Speech Lang Hear Res. 2022 May 27;65(6):2343–63. doi: 10.1044/2022_JSLHR-22-00051 (PMC9907440; doi:10.1044/2022_jslhr-22-00051), 2022-05-27
Supplement: JSLHR-65-2343-s002.pdf [file JSLHR-65-2343-s002.pdf]

## Vanderbilt Fatigue Scale-Child (VFS-C)

**This scale is designed to assess listening-related fatigue in children.**

Sometimes people feel tired from listening and trying to understand. We would like to know how you feel when you listen in different places.

**Please read each sentence and circle the SINGLE response that best describes how often you feel or act that way in a typical WEEK.**

| ITEM                                                                    | NEVER | RARELY | SOMETIMES | OFTEN | ALMOST ALWAYS |
|-------------------------------------------------------------------------|-------|--------|-----------|-------|---------------|
| 1. I want to "zone out" in very noisy places.                           | 0     | 1      | 2         | 3     | 4             |
| 2. It is hard for me to concentrate when lots of people are talking.    | 0     | 1      | 2         | 3     | 4             |
| 3. My brain gets tired after listening all day.                         | 0     | 1      | 2         | 3     | 4             |
| 4. I get worn out from listening at school.                             | 0     | 1      | 2         | 3     | 4             |
| 5. Trying to listen at school stresses me out.                          | 0     | 1      | 2         | 3     | 4             |
| 6. I use a lot of energy trying to listen in class.                     | 0     | 1      | 2         | 3     | 4             |
| 7. I want to go to sleep after a long day of listening.                 | 0     | 1      | 2         | 3     | 4             |
| 8. I give up trying to listen when I get tired.                         | 0     | 1      | 2         | 3     | 4             |
| 9. I get so tired from listening that I don't want to do anything else. | 0     | 1      | 2         | 3     | 4             |
| 10. I feel worn out when I have to listen carefully.                    | 0     | 1      | 2         | 3     | 4             |

# **Vanderbilt Fatigue Scale-Child (VFS-C)**

## **Scoring information**

### **Summed Scoring**

**VFS-C Total Score:** To calculate a score simply sum the responses to each item. VFS-C Total scores can range from 0 to 40.

### **Item Response Theory (IRT) Scoring**

R code capable of calculating IRT scale scores from data sets of VFS-Peds raw scores is available for free download from the following link: <https://osf.io/vpjf5/>
