# Supplementary material for: Development and Evaluation of Pediatric Versions of the Vanderbilt Fatigue Scale for Children With Hearing Loss
Source: PubMed Central journal article supplement — J Speech Lang Hear Res. 2022 May 27;65(6):2343–63. doi: 10.1044/2022_JSLHR-22-00051 (PMC9907440; doi:10.1044/2022_jslhr-22-00051), 2022-05-27
Supplement: JSLHR-65-2343-s003.pdf [file JSLHR-65-2343-s003.pdf]

## Vanderbilt Fatigue Scale-Parent (VFS-P)

**This scale is designed to assess listening-related fatigue in children.**

Sometimes communicating, or just trying to listen and understand, can be physically, mentally, or emotionally tiring for children.

**For each item below, select the SINGLE response that best describes how often your child experiences the following in a typical WEEK.**

| <b>MENTAL FATIGUE</b>                                               | <b>NEVER</b> | <b>RARELY</b> | <b>SOMETIMES</b> | <b>OFTEN</b> | <b>ALMOST ALWAYS</b> |
|---------------------------------------------------------------------|--------------|---------------|------------------|--------------|----------------------|
| 1. My child gets frustrated when it is difficult to hear.           | 0            | 1             | 2                | 3            | 4                    |
| 2. My child prefers to be alone after listening for a long time.    | 0            | 1             | 2                | 3            | 4                    |
| 3. My child shuts down after listening for a long time.             | 0            | 1             | 2                | 3            | 4                    |
| 4. Listening takes a lot of effort for my child.                    | 0            | 1             | 2                | 3            | 4                    |
| 5. My child gets tired of listening by the end of the day.          | 0            | 1             | 2                | 3            | 4                    |
| 6. My child shuts down if he/she becomes frustrated from listening. | 0            | 1             | 2                | 3            | 4                    |
| 7. My child "gives up" in difficult listening situations.           | 0            | 1             | 2                | 3            | 4                    |
| <b>PHYSICAL FATIGUE</b>                                             | <b>NEVER</b> | <b>RARELY</b> | <b>SOMETIMES</b> | <b>OFTEN</b> | <b>ALMOST ALWAYS</b> |
| 8. My child needs time to relax after school.                       | 0            | 1             | 2                | 3            | 4                    |
| 9. My child is so tired that he/she lays down to rest.              | 0            | 1             | 2                | 3            | 4                    |
| 10. My child seems drained at the end of the school day.            | 0            | 1             | 2                | 3            | 4                    |
| 11. My child is more tired during the week than on weekends.        | 0            | 1             | 2                | 3            | 4                    |
| 12. My child needs to relax after a tiring day of listening.        | 0            | 1             | 2                | 3            | 4                    |

# **Vanderbilt Fatigue Scale-Parent (VFS-P)**

## **Scoring information**

### **Summed Scoring**

**VFS-P Mental Fatigue Subscale Score:** To calculate a score simply sum the responses to items 1-7.

VFS-P Mental fatigue subscale scores can range from 0 to 28.

**VFS-P Physical Fatigue Subscale Score:** To calculate a score simply sum the responses to items 8-12.

VFS-P Physical fatigue subscale scores can range from 0 to 20.

### **Item Response Theory (IRT) Scoring**

R code capable of calculating IRT scale scores from data sets of VFS-Peds raw scores is available for free download from the following link: <https://osf.io/vpjf5/>
