# Supplementary material for: Development and Evaluation of Pediatric Versions of the Vanderbilt Fatigue Scale for Children With Hearing Loss
Source: PubMed Central journal article supplement — J Speech Lang Hear Res. 2022 May 27;65(6):2343–63. doi: 10.1044/2022_JSLHR-22-00051 (PMC9907440; doi:10.1044/2022_jslhr-22-00051), 2022-05-27
Supplement: JSLHR-65-2343-s004.pdf [file JSLHR-65-2343-s004.pdf]

## Vanderbilt Fatigue Scale-Teacher (VFS-T)

**This scale is designed to assess listening-related fatigue in children.**

Sometimes communicating, or just trying to listen and understand, can be physically, mentally, or emotionally tiring for children.

**For each item below, select the SINGLE response that best describes how often your student experiences the following in a typical WEEK.**

| ITEM                                                                            | NEVER | RARELY | SOMETIMES | OFTEN | ALMOST ALWAYS |
|---------------------------------------------------------------------------------|-------|--------|-----------|-------|---------------|
| 1. The student will “check out” after long periods of listening.                | 0     | 1      | 2         | 3     | 4             |
| 2. The student seems less motivated to do work after listening for a long time. | 0     | 1      | 2         | 3     | 4             |
| 3. The student stops participating when struggling to hear.                     | 0     | 1      | 2         | 3     | 4             |
| 4. The student seems to get worn out from listening all day at school.          | 0     | 1      | 2         | 3     | 4             |
| 5. The student has trouble concentrating when it is difficult to hear.          | 0     | 1      | 2         | 3     | 4             |
| 6. The student seems to give up more easily when having trouble listening.      | 0     | 1      | 2         | 3     | 4             |
| 7. The student appears irritated when it is hard to hear and understand.        | 0     | 1      | 2         | 3     | 4             |
| 8. The student needs listening breaks in order to stay on task.                 | 0     | 1      | 2         | 3     | 4             |

# **Vanderbilt Fatigue Scale-Teacher (VFS-T)**

## **Scoring information**

### **Summed Scoring**

**VFS-T Total Score:** To calculate a score simply sum the responses to each item.

VFS-T Total scores can range from 0 to 32.

### **Item Response Theory (IRT) Scoring**

R code capable of calculating IRT scale scores from data sets of VFS-Peds raw scores is available for free download from the following link: <https://osf.io/vpjf5/>
