# Supplementary material for: Development and Evaluation of Pediatric Versions of the Vanderbilt Fatigue Scale for Children With Hearing Loss
Source: PubMed Central journal article supplement — J Speech Lang Hear Res. 2022 May 27;65(6):2343–63. doi: 10.1044/2022_JSLHR-22-00051 (PMC9907440; doi:10.1044/2022_jslhr-22-00051), 2022-05-27
Supplement: JSLHR-65-2343-s005.pdf [file JSLHR-65-2343-s005.pdf]

**Supplemental Material S5.** VFS-Peds item parameter estimates.

*VFS-C Item Parameter Discrimination and Threshold Estimates (EST) and Standard Errors (SE)*

| Items | Discrimination |       | Threshold 1 |       | Threshold 2 |       | Threshold 3 |       | Threshold 4 |       |
|-------|----------------|-------|-------------|-------|-------------|-------|-------------|-------|-------------|-------|
|       | EST            | SE    | EST         | SE    | EST         | SE    | EST         | SE    | EST         | SE    |
| 1     | 1.137          | 0.160 | -2.267      | 0.243 | -1.121      | 0.183 | 0.660       | 0.171 | 1.564       | 0.203 |
| 2     | 1.489          | 0.206 | -3.800      | 0.396 | -2.472      | 0.274 | -0.517      | 0.187 | 0.962       | 0.200 |
| 3     | 2.711          | 0.339 | -3.580      | 0.413 | -1.718      | 0.289 | 1.089       | 0.284 | 2.827       | 0.375 |
| 4     | 2.974          | 0.375 | -3.328      | 0.422 | -1.096      | 0.303 | 1.707       | 0.314 | 3.646       | 0.435 |
| 5     | 1.832          | 0.233 | -1.788      | 0.253 | -0.260      | 0.207 | 1.802       | 0.243 | 2.968       | 0.322 |
| 6     | 1.632          | 0.226 | -1.950      | 0.241 | -0.435      | 0.196 | 1.118       | 0.208 | 2.745       | 0.298 |
| 7     | 1.612          | 0.215 | -2.080      | 0.241 | -0.621      | 0.195 | 0.947       | 0.204 | 2.333       | 0.268 |
| 8     | 1.494          | 0.204 | -1.516      | 0.218 | 0.065       | 0.183 | 1.618       | 0.221 | 3.384       | 0.337 |
| 9     | 2.426          | 0.282 | -1.730      | 0.279 | 0.746       | 0.249 | 3.055       | 0.338 | 4.721       | 0.492 |
| 10    | 2.163          | 0.279 | -2.581      | 0.333 | -0.356      | 0.226 | 1.760       | 0.269 | 3.913       | 0.420 |

Note. Values are based on the unidimensional graded response model using 10 items.

*VFS-T Item Parameter Discrimination and Threshold Estimates (EST) and Standard Errors (SE)*

| Items | Discrimination |       | Threshold 1 |       | Threshold 2 |       | Threshold 3 |       | Threshold 4 |       |
|-------|----------------|-------|-------------|-------|-------------|-------|-------------|-------|-------------|-------|
|       | EST            | SE    | EST         | SE    | EST         | SE    | EST         | SE    | EST         | SE    |
| 1     | 3.067          | 0.285 | -5.981      | 0.484 | -2.717      | 0.256 | 0.414       | 0.199 | 3.793       | 0.323 |
| 2     | 3.882          | 0.364 | -6.232      | 0.523 | -2.527      | 0.291 | 0.617       | 0.238 | 4.594       | 0.404 |
| 3     | 3.231          | 0.282 | -4.768      | 0.371 | -1.366      | 0.219 | 1.162       | 0.213 | 4.246       | 0.349 |
| 4     | 2.489          | 0.203 | -4.440      | 0.317 | -2.206      | 0.205 | 0.267       | 0.169 | 2.635       | 0.228 |
| 5     | 2.711          | 0.242 | -5.365      | 0.420 | -3.002      | 0.262 | -0.243      | 0.180 | 2.840       | 0.251 |
| 6     | 3.637          | 0.324 | -5.824      | 0.470 | -2.308      | 0.273 | 0.565       | 0.226 | 4.125       | 0.354 |
| 7     | 1.696          | 0.151 | -2.869      | 0.212 | -0.878      | 0.143 | 0.714       | 0.137 | 2.601       | 0.188 |
| 8     | 2.586          | 0.210 | -3.789      | 0.288 | -1.275      | 0.185 | 1.252       | 0.187 | 3.660       | 0.268 |

Note. Values are based on the unidimensional graded response model using 8 items.

*VFS-P Subscale Item Parameter Discrimination and Threshold Estimates (EST) and Standard Errors (SE)*

| Items            | Discrimination |       | Threshold 1 |       | Threshold 2 |       | Threshold 3 |       | Threshold 4 |       |
|------------------|----------------|-------|-------------|-------|-------------|-------|-------------|-------|-------------|-------|
|                  | EST            | SE    | EST         | SE    | EST         | SE    | EST         | SE    | EST         | SE    |
| Mental Fatigue   |                |       |             |       |             |       |             |       |             |       |
| 1                | 1.742          | 0.134 | -2.613      | 0.187 | -0.714      | 0.134 | 1.182       | 0.138 | 3.099       | 0.204 |
| 2                | 2.446          | 0.187 | -2.196      | 0.197 | -0.245      | 0.158 | 1.799       | 0.180 | 3.678       | 0.246 |
| 3                | 3.857          | 0.304 | -3.645      | 0.322 | -0.309      | 0.223 | 2.758       | 0.276 | 5.963       | 0.415 |
| 4                | 2.705          | 0.202 | -2.962      | 0.223 | -0.797      | 0.173 | 1.674       | 0.191 | 3.690       | 0.270 |
| 5                | 4.033          | 0.320 | -4.412      | 0.352 | -1.328      | 0.240 | 1.581       | 0.253 | 4.709       | 0.391 |
| 6                | 3.741          | 0.322 | -3.189      | 0.311 | -0.056      | 0.217 | 2.454       | 0.267 | 5.104       | 0.418 |
| 7                | 2.845          | 0.220 | -2.558      | 0.224 | -0.103      | 0.175 | 2.221       | 0.214 | 4.595       | 0.309 |
| Physical Fatigue |                |       |             |       |             |       |             |       |             |       |
| 8                | 2.133          | 0.179 | -4.320      | 0.284 | -2.641      | 0.194 | -0.819      | 0.150 | 1.530       | 0.169 |
| 9                | 1.979          | 0.162 | -1.665      | 0.160 | 0.278       | 0.141 | 2.091       | 0.167 | 3.923       | 0.239 |
| 10               | 3.833          | 0.382 | -5.751      | 0.530 | -2.773      | 0.319 | 0.864       | 0.230 | 4.101       | 0.387 |
| 11               | 2.774          | 0.227 | -4.912      | 0.340 | -2.850      | 0.232 | -0.526      | 0.176 | 2.373       | 0.221 |
| 12               | 3.191          | 0.300 | -4.354      | 0.377 | -2.071      | 0.242 | 0.589       | 0.196 | 3.264       | 0.303 |

Note. Values are based on the unidimensional graded response model using 12 items (7 items in the Mental domain (items 1-7) and 5 items in the Physical domain (items 8-12)).
